# Supplementary material for: Novel insights into the effect of folate–albumin binding on the transport of ascorbic acid as an anticancer agent: chemometric analysis based on combined spectroscopic and electrochemical studies
Source: Royal Society of Chemistry journal article supplement (doi:10.1039/c8nj01572d), 2018-01-01
Supplement: c8nj01572d1.pdf [file c8nj01572d1.pdf]

1 **Novel insights into the effect of folate-albumin binding on the transport of**  
2 **ascorbic acid as an anticancer agent: Chemometric analysis based on**  
3 **combined spectroscopic and electrochemical studies**

4 Saleheh Abbasi <sup>a</sup>, Sajjad Gharaghani <sup>\*b</sup>, Ali Benvidi <sup>\*a</sup>, Masoud Rezaeinasab <sup>a</sup>

5  
6 <sup>a</sup> *Department of Chemistry, Faculty of Science, Yazd University, Yazd 89195-741, Iran*

7 <sup>b</sup> *Laboratory of Bioinformatics & Drug Design, Institute of Biochemistry and Biophysics,*  
8 *University of Tehran, Tehran, Iran*

9  
10  
11  
12  
13  
14  
15  
16  
17  
18  
19  
20  
21  
22  
23  
24  
25  
26 <sup>\*1</sup> Corresponding author: E-mail addresses: s.gharaghani@ut.ac.ir;  
27 Tel.: +98 216 111 3451; Fax: +98-216-6956977

28 <sup>\*2</sup> Corresponding author: E-mail addresses: abenvidi@yazd.ac.ir, benvidi89@gmail.com ;  
29 Tel.: +98 353 812 2645; Fax: +98-353-8210644

30  
31  
32

A

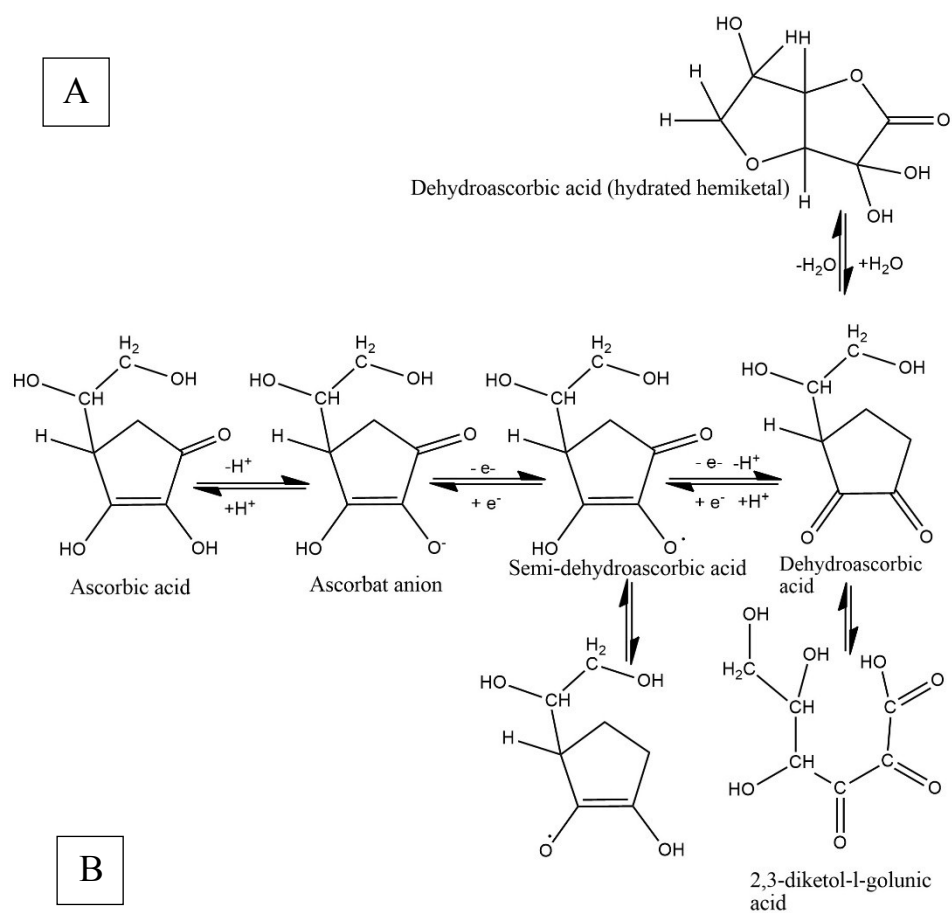

B

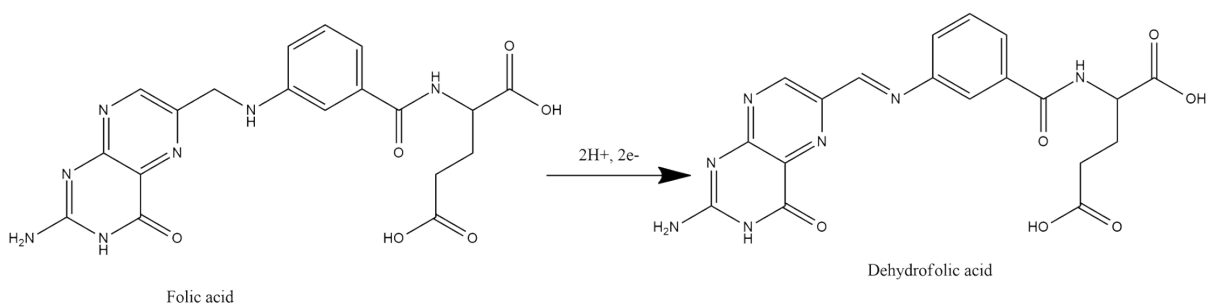

47

48

49

50

51

52

53

54

55 Scheme 1 (A) Oxidation of ascorbic acid at GCE (B) Oxidation of folic acid at GCE

56

57

58

59

60

61

62

63

64

65 Table S1. Amino acid residues involved in the interaction with the free binding energy for the  
66 best selected docking positions

| Complex | $\Delta G_{\text{binding}}$ (KJ mol <sup>-1</sup> ) | Amino acids in the vicinity of the ligands                                                                           |
|---------|-----------------------------------------------------|----------------------------------------------------------------------------------------------------------------------|
| BSA-FA  | -24.57                                              | Asp-111, Ser-109, Arg-144, Leu-189, His-145, Arg-185, Glu-140, Tyr-137, Tyr-160, Pro-117, Ile-181, Ile-141, Leu-114. |
| BSA-AA  | -19.40                                              | Lue-249, Lue-250, Lue-22, Lue-66, Val-23, Ala-26, Gly-247, His-67, Phe-70, Asp-248.                                  |

67

68

69

70

71

72

73

74

75

76

77

78

79

80

81

82

83

84

85

86

87

88

89

90

91

92

93 Figure captions

94 Fig. S1 Relationship between  $\log[\Delta I/(\Delta I_{\max}-\Delta I)]$  and  $\log [AA]$ .

95 Fig. S2 Relationship between  $\log[\Delta I/(\Delta I_{\max}-\Delta I)]$  and  $\log [FA]$ .

96

97

98

99

100

101

102

103

104

105

106

107

108

109

110

111

112

113

114

115

116

117

118

119

120

121

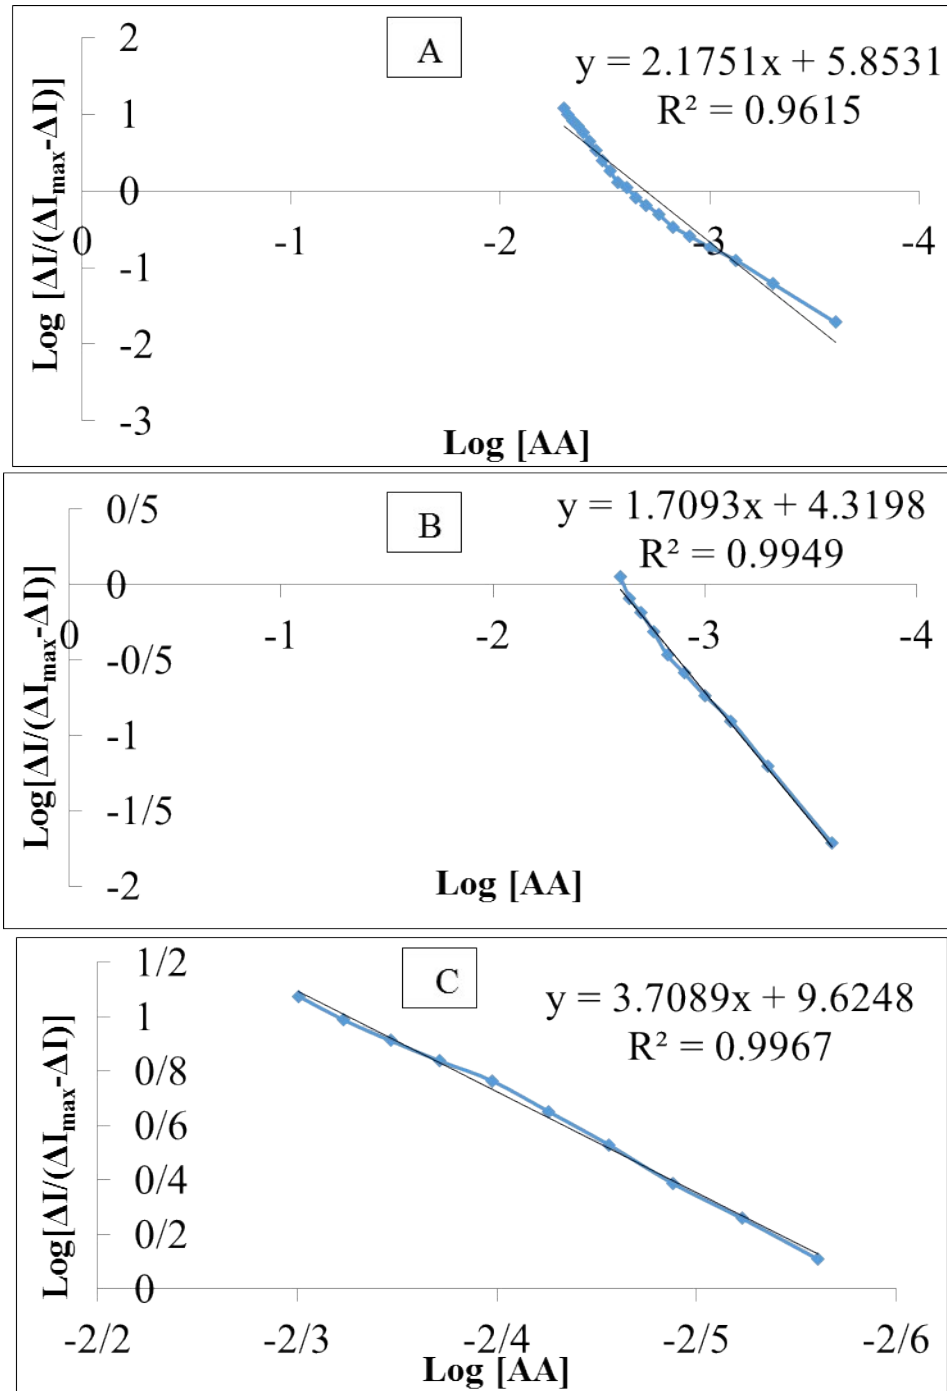

122

123

124

125

126

127

Fig. S1

128

129

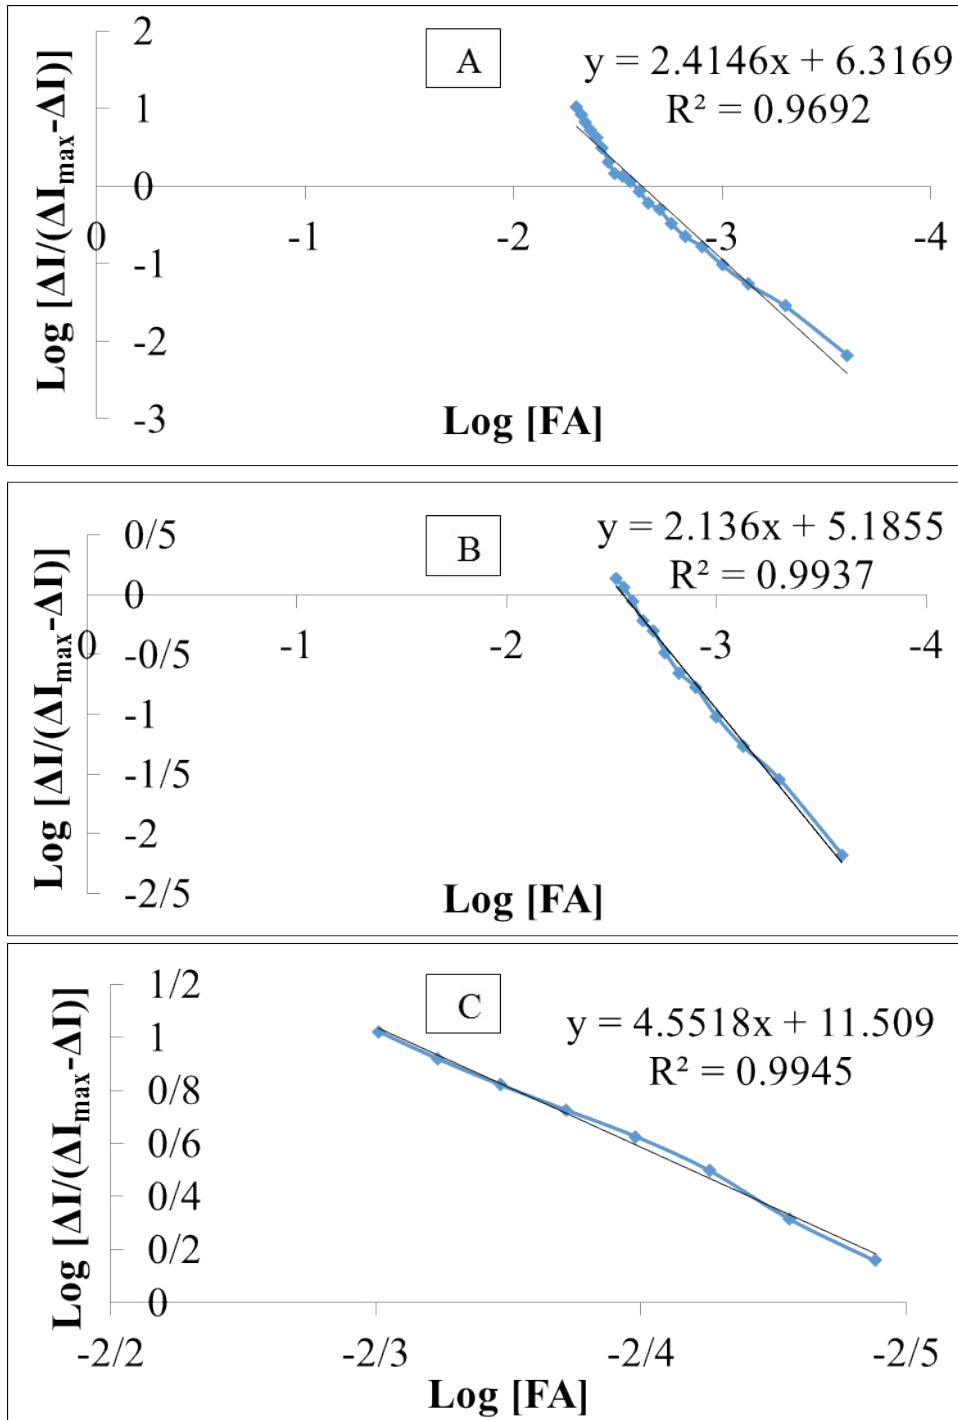

130

131

132

133

134

135

Fig. S2
